# Supplementary material for: Deciphering immune responses primed by a bacterial lipopeptide in wheat towards Zymoseptoria tritici
Source: Front Plant Sci. 2023 Jan 26;13:1074447. doi: 10.3389/fpls.2022.1074447 (PMC9909289; doi:10.3389/fpls.2022.1074447)
Supplement: Supplementary file 2 [file Table_1.xlsx]

## Sheet: Feuil1
Supplementary Table S1. Relative gene expression profiles illustrating fungus effect in presence of mycosubtilin (M-D5-i vs M-D5-Ni) and the whole spectrum of plant responses to mycosubtilin and fungus (M-D5-i vs C-D5-Ni). This table is related to supplementary figure S4. Gene-related physiological processes are represented on the right part of the graph and were determined using NCBI, AmiGO 2 Ge…
	A	B
Name	M-D5-i vs M-D5-Ni	M-D5-i vs C-D5-Ni	Description	TopHit	ID	RefNumber
Response to abiotic stress
CA624093	10.8866	7.92549	Low temperature induced protein	ta|CA624093|ta|CK217285|tc|TC410528	A_99_P459967	11840
TA73273_4565	3.17709	10.1871	ATP-dependent RNA helicase	ta|TA73273_4565|tc|TC388850|tc|TC394717	A_99_P271141	28142
TA54418_4565	5.333	1	Cold acclimation protein WCOR413	ta|TA54418_4565|tc|TC369682|tc|TC431932	A_99_P210931	43524
TA84187_4565	0.446413	1	Protein phosphatase type 2-C	ta|TA84187_4565|ta|BJ314772|ta|CK207520|tc|TC406338	A_99_P308421	21815
TA92949_4565	0.296575	1	Efflux transporter, RND family, MFP subunit	ta|TA92949_4565|tc|TC418808	A_99_P144213	15689
AY785903	0.335385	1	TaCBF6	gb|AY785903|gb|DY761330|ta|TA53929_4565|tc|TC369010	A_99_P000681	22350
TA67331_4565	0.305965	1	Proline-rich protein precursor	ta|TA67331_4565|ta|CJ664049|tc|TC403126|tc|TC430854	A_99_P498102	7990
TC381840	1	2.60783	Cold acclimation protein WCOR518	tc|TC381840	A_99_P421457	19082
TA100085_4565	1	3.62985	ARK protein	ta|TA100085_4565|tc|TC398244	A_99_P360266	21911
TA79737_4565	1	3.94558	Importin beta-like protein	ta|TA79737_4565|ta|TA79738_4565|ta|CA501866|tc|TC401423	A_99_P293321	35865
TA57180_4565	1	2.75453	Actin	ta|TA57180_4565|ta|BJ264832|tc|TC372298	A_99_P217276	4091
TA74058_4565	1	2.52529	Serine hydroxymethyltransferase	ta|TA74058_4565|ta|CA733517|ta|CK202660|tc|TC433720	A_99_P008296	33374
Response to oxidative stress
TA58666_4565	4.15594	8.39366	Metallothionein-like protein type 3	ta|TA58666_4565|tc|TC401261	A_99_P446552	19674
TA102260_4565	7.20712	5.88492	Nitrite reductase apoprotein	ta|TA102260_4565|tc|TC448413	A_99_P366657	8326
TA77625_4565	1	3.33968	Chloroplast glutathione reductase	ta|TA77625_4565|tc|TC396734	A_99_P285981	31266
TA65180_4565	1	6.90923	PR17d precursor	ta|TA65180_4565|ta|CA682143|tc|TC415690	A_99_P242791	20412
TA67746_4565	1	3	Aldose reductase	ta|TA67746_4565|ta|CA741454|tc|TC374388|tc|TC437762	A_99_P252121	11372
TA64544_4565	1	2.90823	Mitochondrial lipoamide dehydrogenase	ta|TA64544_4565|ta|TA64547_4565|tc|TC371259	A_99_P240241	32379
TA100790_4565	1	2.83978	Cytochrome P450 family protein	ta|TA100790_4565|tc|TC390997	A_99_P362271	32984
TA65542_4565	1	2.72336	GMC oxidoreductase	ta|TA65542_4565|tc|TC461125|tc|TC381336	A_99_P244206	18477
TA61435_4565	1	0.196594	Peroxidase 6	ta|TA61435_4565|ta|CA685752|tc|TC407750|tc|TC450152	A_99_P552147	16980
BQ161851	1	0.471933	Peroxidase	ta|BQ161851|tc|TC390065	A_99_P431937	25512
CK212695	1	0.42139	Class III peroxidase 62 precursor	ta|CK212695|tc|TC370038	A_99_P407997	44165
Response to pathogens
TA55707_4565	7.40795	3.77429	Thaumatin-like protein TLP4	ta|TA55707_4565|ta|CA670411|ta|CV774285|tc|TC413450	A_99_P509202	23176
TA69803_4565	6.4953	5.38925	VTC2-like protein	ta|TA69803_4565|ta|TA69802_4565|tc|TC383677|tc|TC391835	A_99_P259271	42520
TC426538	4.2133	1	Chitinase 2	tc|TC426538	A_99_P488752	20923
TA72415_4565	5.58257	1	Chitinase	ta|TA72415_4565|ta|CK212185|tc|TC372159	A_99_P268406	11345
GR302911	5.87641	1	WIR1	gb|GR302911|tc|TC419186	A_99_P488332	14017
TC419763	9.38186	1	Protein WIR1A	tc|TC419763	A_99_P475682	36715
TA76681_4565	0.412107	1	HS1-like protein	ta|TA76681_4565|ta|TA76683_4565|tc|TC444375|tc|TC399271	A_99_P194333	16022
EF570122	0.302997	1	Pathogen-inducible transcription factor ERF3	gb|EF570122|gb|HP624359|ta|TA92949_4565|ta|TA90257_4565	A_99_P177974	11088
AF112963	1	4.38797	Chitinase II precursor (Cht2)	gb|AF112963|ta|TA93063_4565|ta|CJ561279|tc|TC371620	A_99_P000381	24453
TC370624	1	3.41765	MLA7	tc|TC370624	A_99_P408547	22360
TA83143_4565	1	3.07602	Hydrolase, alpha/beta fold family-like	ta|TA83143_4565|ta|TA83142_4565|ta|CJ608712|tc|TC381178	A_99_P304906	15369
AY387686	1	4.00904	Harpin binding protein 1 (HrBP1-1)	gb|AY387686|ta|TA89246_4565|tc|TC368718	A_99_P645996	44828
TC404042	1	3.81538	Phytosulfokine	tc|TC404042	A_99_P450387	20130
TA53249_4565	1	0.225039	IPS1 riboregulator	ta|TA53249_4565|ta|CJ668336|tc|TC404244	A_99_P207336	20707
Secondary metabolism
DQ208192	12.9069	7.4518	Flavanone 3-hydroxylase	gb|DQ208192|ta|TA54268_4565|ta|TA53990_4565|ta|TA54125_4565	A_99_P163772	30321
TA69335_4565	1	10.913	Chalcone synthase 2	ta|TA69335_4565|ta|BQ619684|ta|CD903042|tc|TC385194	A_99_P174849	25042
AY286098	1	5.408	Chalcone synthase (CHS1)	gb|AY286098|gb|AY286097|ta|TA87356_4565|tc|TC368698	A_99_P163037	29628
TA50072_4565	1	5.94853	Pyridoxal biosynthesis protein PDX1.1	ta|TA50072_4565|ta|BJ256106|tc|TC413627	A_99_P197801	18956
JQ307210	1	2.21958	TaJNFPS-4 farnesyl pyrophosphate synthase	gb|JQ307210|ta|TA68574_4565|ta|TA68575_4565|ta|TA68576_4565	A_99_P255071	6487
TA83418_4565	1	2.88483	GGDP synthase	ta|TA83418_4565|tc|TC428633|tc|TC458266	A_99_P305831	14702
TA83418_4565	1	2.3471	Isochorismate synthetase	ta|TA83418_4565|tc|TC458266|tc|TC428633	A_99_P565517	1945
Flowering and seed maturation
TA86268_4565	5.37379	11.977	CONSTANS interacting protein 5	ta|TA86268_4565|tc|TC383052	A_99_P315626	21018
TA84120_4565	0.489385	0.513441	Protein EGG APPARATUS-1	ta|TA84120_4565|tc|TC437285	A_99_P308216	36050
TA50354_4565	1	4.02111	Pyruvate kinase	ta|TA50354_4565|tc|TC455627|tc|TC376272|tc|TC423822	A_99_P558877	37866
Growth and development
TA99155_4565	6.47395	7.56753	DNA replication and repair protein RecF	ta|TA99155_4565|tc|TC406095|tc|TC437382	A_99_P357521	34334
TC405303	0.220745	1	Mitogen-activated protein kinase 7	tc|TC405303	A_99_P452302	22398
CK211204	0.414365	1	ZIM motif family protein	ta|CK211204|ta|BM138703|ta|CK212740|tc|TC416451	A_99_P469812	31070
CK196320	1	2.35133	Cell death associated protein	ta|CK196320|tc|TC447100	A_99_P536337	8482
TA84990_4565	1	2.86425	CDK5RAP1-like protein	ta|TA84990_4565|ta|TA84992_4565|ta|CK157043|tc|TC371336	A_99_P311161	19118
TC380019	1	2.53268	SAP-like protein BP-73	tc|TC380019	A_99_P419147	17470
CA612835	1	0.515202	Abscisic stress ripening protein-like protein	ta|CA612835|tc|TC437105|tc|TC418893	A_99_P512357	23935
Cell wall structure and activity
TA87087_4565	0.297208	1	Cinnamyl alcohol dehydrogenase	ta|TA87087_4565|tc|TC406587	A_99_P318481	8569
TA66611_4565	0.290188	0.26938	Fasciclin-like protein FLA15	ta|TA66611_4565|ta|CA732456|tc|TC410644|tc|TC446041	A_99_P248201	22500
CK152333	0.477748	0.302125	Type 1 non specific lipid transfer protein precursor	ta|CK152333|tc|TC400994	A_99_P446157	36915
CK205454	1	0.485639	Non-specific lipid transfer protein 1 precursor	ta|CK205454|tc|TC386576	A_99_P427502	36085
TA61828_4565	1	0.384563	Non-specific lipid-transfer protein	ta|TA61828_4565|tc|TC390968|tc|TC385911	A_99_P231006	27677
TC383836	1	2.4738	Nucleosome assembly protein 1-like protein 2	tc|TC383836	A_99_P423887	18218
TA102372_4565	1	3.11641	Hydroxyproline-rich glycoprotein DZ-HRGP precursor	ta|TA102372_4565|tc|TC441307	A_99_P039309	28910
TA91600_4565	1	3.19237	Protein DSE2 precursor	ta|TA91600_4565|tc|TC418890|tc|TC423081	A_99_P333491	35745
Chloroplast structure and function
TA66617_4565	1	2.82744	Plastid-specific 30S ribosomal protein 3, chloroplast precursor	ta|TA66617_4565|ta|CJ721752|ta|BE418700|tc|TC373998	A_99_P248226	33266
TA95179_4565	1	2.9719	Amidophosphoribosyl-transferase	ta|TA95179_4565|tc|TC449942	A_99_P345026	40498
CD879285	1	2.66379	Triosephosphate isomerase, chloroplast precursor	ta|CD879285|tc|TC392505	A_99_P434992	19245
TA103644_4565	1	3.05411	CRS2-associated factor 1, chloroplast precursor	ta|TA103644_4565|tc|TC444558	A_99_P010186	14454
TA92734_4565	1	0.400986	Diap1 protein	ta|TA92734_4565|tc|TC422388	A_99_P337136	42984
Pigment biosynthesis
TA92426_4565	1	3.32258	Beta-carotene hydroxylase	ta|TA92426_4565|tc|TC401433	A_99_P336181	23802
AY596267	1	3.84709	Polyphenol oxidase	gb|AY596267|ta|TA101253_4565|tc|TC369222	A_99_P081185	22056
TA70845_4565	1	3.21783	Porphobilinogen deaminase	ta|TA70845_4565|ta|BQ169430|tc|TC372436|tc|TC452770	A_99_P155942	10728
TA58881_4565	1	2.8977	Glutamate-1-semialdehyde 2,1-aminomutase, chloroplast precursor	ta|TA58881_4565|tc|TC380639	A_99_P419897	32620
TA89084_4565	1	2.42126	S-adenosyl-L-methionine Mg-protoporphyrin IX methyltranserase	ta|TA89084_4565|ta|CD883420|tc|TC429116	A_99_P494142	24157
TA72038_4565	1	2.77444	Lycopene beta-cyclase	ta|TA72038_4565|tc|TC429030	A_99_P267096	33927
Light harvesting
TC371150	1	0.0736782	Chlorophyll a/b-binding protein WCAB precursor	tc|TC371150	A_99_P409112	19146
TA63710_4565	1	0.458033	Chlorophyll a-b binding protein of LHCII type III, chloroplast precursor	ta|TA63710_4565|tc|TC390034	A_99_P237481	36780
TA55816_4565	1	0.390007	Light-harvesting complex I	ta|TA55816_4565|ta|CJ731763|tc|TC435331	A_99_P214401	27084
TC372144	1	0.382714	Chlorophyll a/b binding protein precursor	tc|TC372144	A_99_P410077	391
CK217674	1	0.334476	Chloroplast pigment-binding protein CP24	ta|CK217674|tc|TC394184	A_99_P437157	39278
Photosynthesis
CK212581	1	3.3828	Photosystem II reaction center psb28 protein	ta|CK212581|tc|TC384139	A_99_P424262	24845
TA64071_4565	1	3.59677	Cytochrome b6-f complex iron-sulfur subunit, chloroplast precursor	ta|TA64071_4565|tc|TC406166	A_99_P238726	35747
AF251264	1	3.88994	Ribulose bisphosphate carboxylase activase B (RcaB)	gb|AF251264|ta|TA54036_4565|ta|TA53903_4565|ta|CA660217	A_99_P449812	42320
Carbohydrate metabolism
CJ604231	1	3.53078	Carbohydrate kinase-like protein	ta|CJ604231|tc|TC397825	A_99_P441937	19794
TA83009_4565	1	2.61811	FKBP-type peptidyl-prolyl cis-trans isomerase 3, chloroplast precursor	ta|TA83009_4565|tc|TC389035	A_99_P430677	38537
TA64268_4565	1	2.71228	Fructose-bisphosphate aldolase	ta|TA64268_4565|ta|CJ558338|tc|TC376307	A_99_P239376	27725
TA64671_4565	1	2.04091	UTP--glucose-1-phosphate uridylyltransferase	ta|TA64671_4565|ta|CA607514|tc|TC370098|tc|TC370896	A_99_P004441	24422
TA57382_4565	1	4.11548	Phosphate/phosphoenolpyruvate translocator	ta|TA57382_4565|tc|TC393910	A_99_P217791	33087
TA75511_4565	1	4.86827	Monosaccharide transporter 4	ta|TA75511_4565|ta|CD884543|tc|TC378153	A_99_P278701	5738
TA83785_4565	1	4.47347	Beta-amylase PCT-BMYI	ta|TA83785_4565|ta|CK212937|ta|CD938974|tc|TC432151	A_99_P307146	32293
Amino-acids metabolism
DQ139267	2.78933	4.31913	4-hydroxyphenylpyruvate dioxygenase	gb|DQ139267|ta|TA68086_4565|ta|TA68079_4565|ta|TA68085_4565	A_99_P637271	37769
TA82049_4565	4.47826	2.75939	Bifunctional aspartokinase/homoserine dehydrogenase 2, chloroplast precursor	ta|TA82049_4565|ta|TA82051_4565|tc|TC388532|tc|TC398166	A_99_P163227	42192
TC430171	0.441669	1	Indole-3-glycerol phosphate lyase	tc|TC430171	A_99_P496502	8009
TA69994_4565	0.542818	1	Glutamate dehydrogenase	ta|TA69994_4565|ta|CJ567636|tc|TC387564	A_99_P259951	10977
TA64535_4565	1	3.14519	Glycine decarboxylase P subunit	ta|TA64535_4565|ta|TA64537_4565|tc|TC374621|tc|TC375538	A_99_P240211	15342
EU236151	1	3.36166	Arginine decarboxylase	gb|EU236151|ta|TA61495_4565|tc|TC428833	A_99_P229841	38415
TA64069_4565	1	5.27407	Mitochondrial aspartate-glutamate carrier protein-like	ta|TA64069_4565|tc|TC373422	A_99_P238716	33459
CJ667842	1	3.33028	Ferredoxin, chloroplast precursor	ta|CJ667842|tc|TC415949	A_99_P436607	43120
TA63842_4565	1	2.33109	Inositol monophosphatase family protein	ta|TA63842_4565|tc|TC396412	A_99_P237761	10378
TC369894	1	3.38695	Glycine/D-amino acid oxidases-like	tc|TC369894	A_99_P427247	29953
TC448142	1	2.87017	Glycine cleavage system H protein, mitochondrial precursor	tc|TC448142	A_99_P538777	8089
TC413834	1	2.50711	S-adenosylmethionine:2-demethylmenaquinone methyltransferase-like	tc|TC413834	A_99_P465342	10889
TA79034_4565	1	2.23331	3-dehydroquinate dehydratase/shikimate 5-dehydrogenase	ta|TA79034_4565|tc|TC415011	A_99_P290801	15040
Protein metabolism
TA67255_4565	1	6.27819	Heat-shock protein precursor	ta|TA67255_4565|ta|CK156739|tc|TC429655	A_99_P250376	10187
TA70500_4565	1	4.32976	ATP-dependent Clp protease proteolytic subunit	ta|TA70500_4565|ta|TA70501_4565|tc|TC407681|tc|TC432419	A_99_P261831	33261
TA61948_4565	1	3.5141	C13 endopeptidase NP1 precursor	ta|TA61948_4565|tc|TC398719	A_99_P231506	7777
TC402730	0.469597	0.377597	70 kDa heat shock protein	tc|TC402730	A_99_P448647	36262
HM209063	1	0.346139	Heat shock protein 70-like	gb|HM209063|gb|HP619938|gb|L41505|ta|TA62928_4565	A_99_P234541	16785
TA64099_4565	1	0.382715	Heat shock protein 80 kDa	ta|TA64099_4565|ta|TA64100_4565|tc|TC394212	A_99_P238761	26
Lipid metabolism
TA74269_4565	1	2.97664	Plastid omega-3 fatty acid desaturase	ta|TA74269_4565|tc|TC378240|tc|TC423235	A_99_P274486	33811
Energy metabolism
TC449528	1	0.245702	Cytochrome c	tc|TC449528	A_99_P542662	24896
Signaling
TA82827_4565	1	3.58533	GTP-binding protein-related	ta|TA82827_4565|ta|TA82828_4565|tc|TC399191	A_99_P303856	12334
TA51150_4565	1	3.00105	Serine/threonine kinase	ta|TA51150_4565|tc|TC414433	A_99_P200651	28794
Transcription, RNA-processing, translation
U34402	1	5.11964	Single-subunit RNA polymerase C	gb|U34402|ta|TA88096_4565|tc|TC377460	A_99_P000396	29420
TA85618_4565	3.85033	8.06369	DEAD-box ATP-dependent RNA helicase 26	ta|TA85618_4565|ta|TA85617_4565|tc|TC414240	A_99_P313296	14881
TA91346_4565	1	2.94746	DEAD-box ATP-dependent RNA helicase 22	ta|TA91346_4565|ta|BJ231692|ta|EB512383|tc|TC422954	A_99_P332671	20451
D38485	1	3.84358	Ps16 protein	gb|D38485|ta|TA65373_4565|ta|TA65384_4565|ta|TA65372_4565	A_99_P243491	32092
TA71493_4565	1	4.30469	Elongation factor Ts	ta|TA71493_4565|ta|BG905847|tc|TC372251|tc|TC427891	A_99_P265276	14490
TA88703_4565	1	2.19869	Elongation factor G, mitochondrial precursor	ta|TA88703_4565|tc|TC394963	A_99_P323926	25452
TA85526_4565	1	3.43628	Translation initiation factor IF-2	ta|TA85526_4565|ta|TA85527_4565|tc|TC386070|tc|TC440744	A_99_P426897	36495
CA502352	1	3.39904	Elongation factor	ta|CA502352|tc|TC391064	A_99_P433232	2769
TA79230_4565	1	4.09156	40S ribosomal protein S14	ta|TA79230_4565|ta|TA79231_4565|tc|TC372664|tc|TC439088	A_99_P165432	22492
TA53517_4565	1	3.77431	Ribosomal protein l34	ta|TA53517_4565|ta|CK154685|ta|CK154763|tc|TC387239	A_99_P428417	18198
TA70216_4565	1	3.63764	30S ribosomal protein S17, chloroplast precursor	ta|TA70216_4565|tc|TC393883	A_99_P260786	41398
TA68774_4565	1	3.51237	50S ribosomal protein L1, chloroplast precursor	ta|TA68774_4565|ta|TA68779_4565|tc|TC413191	A_99_P255791	32662
TA71488_4565	1	3.47997	50S ribosomal protein L35	ta|TA71488_4565|ta|CV760107|tc|TC399457	A_99_P265261	23498
TA61485_4565	1	3.45802	Ribosomal protein s6 RPS6-2	ta|TA61485_4565|ta|BJ252423|tc|TC408287	A_99_P229796	30672
TA66609_4565	1	3.37201	Ribosome-like protein	ta|TA66609_4565|tc|TC397699|tc|TC412052	A_99_P441707	27111
TA50993_4565	1	3.28692	Large subunit 26S ribosomal RNA gene	ta|TA50993_4565|tc|TC459184|tc|TC433491	A_99_P568177	38089
TA56520_4565	1	3.24922	Ribosomal protein L35A	ta|TA56520_4565|ta|CA685330|tc|TC444647	A_99_P215981	843
TA61855_4565	1	3.17571	Ribosomal protein L13a	ta|TA61855_4565|ta|TA61850_4565|tc|TC433613	A_99_P231131	34917
TA58672_4565	1	2.95151	Ribosomal protein	ta|TA58672_4565|ta|CD896574|tc|TC397587	A_99_P221126	44143
TA58281_4565	1	2.73904	60S ribosomal protein L44	ta|TA58281_4565|ta|CA700416|ta|BJ278974|tc|TC403059	A_99_P220136	28679
CV767873	1	2.58304	60S ribosomal protein L27	ta|CV767873|tc|TC383776	A_99_P424047	37514
TA61981_4565	1	2.55219	Large subunit 26S ribosomal RNA gene	ta|TA61981_4565|tc|TC442715|tc|TC427655	A_99_P410577	31986
CK214923	1	2.54272	Ribosomal protein L11	ta|CK214923|ta|CK213083|tc|TC427814|tc|TC371864	A_99_P479112	18063
TA64720_4565	1	2.53229	50S ribosomal protein L21, chloroplast precursor	ta|TA64720_4565|ta|BE585576|tc|TC420398	A_99_P240931	20989
TC413718	1	2.4327	60S acidic ribosomal protein P3	tc|TC413718|tc|TC402297	A_99_P421697	43054
TA61076_4565	1	2.37208	60S ribosomal protein L10-2	ta|TA61076_4565|tc|TC376174	A_99_P228111	36378
TA68490_4565	1	2.31615	50S ribosomal protein L28, chloroplast precursor	ta|TA68490_4565|tc|TC381103	A_99_P254736	20009
TA58879_4565	1	2.23229	Ribosomal protein L37	ta|TA58879_4565|ta|TA58882_4565|tc|TC406024|tc|TC418414	A_99_P221536	19773
TA54070_4565	1	2.14384	Ribosomal protein L10A	ta|TA54070_4565|ta|CJ680969|tc|TC419116	A_99_P209766	19576
Other functions
TA91877_4565	1	2.54233	C3meo4	ta|TA91877_4565|tc|TC380332|tc|TC408313	A_99_P334381	24012
TC389894	5.76766	5.77867	Tetratricopeptide repeat (TPR)-containing protein-like	tc|TC389894	A_99_P431697	38421
AF110180	4.61376	1	High-affinity phosphate transporter PT1	gb|AF110180	A_99_P026169	24145
