# Supplementary material for: Deciphering immune responses primed by a bacterial lipopeptide in wheat towards Zymoseptoria tritici
Source: Front Plant Sci. 2023 Jan 26;13:1074447. doi: 10.3389/fpls.2022.1074447 (PMC9909289; doi:10.3389/fpls.2022.1074447)
Supplement: Supplementary file 3 [file Table_2.xlsx]

## Sheet: Feuil1
Supplementary Table S2. Relative gene expression profiles in wheat third-leaves for mycosubtilin early (A) or late elicitation (B), fungus inoculation (C) and priming (D). This table is related to figure 5. Gene-related physiological processes are represented on the right part of the table and were determined using NCBI, AmiGO 2 Gene Ontology, KEGG and UniProt. With A: M-D2-Ni vs C-D2-Ni; B: M-D5…
	A	B	C	D
Name	M-D2-Ni vs C-D2-Ni	M-D5-Ni vs C-D5-Ni	C-D5-i vs C-D5-Ni	M-D5-i vs C-D5-i	Description	TopHit	ID	RefNumber
Response to abiotic stress
TA78527_4565	1	1	0.459362	1	BZIP transcription factor bZIP110	ta|TA78527_4565|tc|TC377904|tc|TC428632	A_99_P289066	42528
AY428036	1	1	0.376769	1	Dehydration response element binding protein	gb|AY428036|gb|EF028780|ta|TA101025_4565|ta|DQ286550	A_99_P074325	23922
EF028787	1	1	0.30432	1	CBFIVd-D22	gb|EF028787|ta|TA111739_4565|tc|TC416713	A_99_P405352	948
TC436852	1	1	0.295474	1	Hly-III related proteins	tc|TC436852	A_99_P511722	6696
EF028785	1	1	0.254309	1	CBFIVd-A22	gb|EF028785|gb|EF028787|gb|AK334356|tc|TC416713	A_99_P140518	15660
EF028775	1	1	0.253465	1	CBFIVb-21.1	gb|EF028775|tc|TC374270	A_99_P012439	20101
CA624093	1	1	8.88242	1	Low temperature induced protein	ta|CA624093|ta|CK217285|tc|TC410528	A_99_P459967	11840
TC381840	1	1	3.06048	1	Cold acclimation protein WCOR518	tc|TC381840	A_99_P421457	19082
TA54418_4565	1	1	2.52972	1	Cold acclimation protein WCOR413	ta|TA54418_4565|tc|TC369682|tc|TC431932	A_99_P210931	43524
CJ693503	3.97433	1	1	1	CBL-interacting protein kinase	ta|CJ693503|tc|TC389753	A_99_P431532	1799
AY625683	3.92324	1	1	1	NAC domain transcription factor (NAC2)	gb|AY625683|ta|TA54177_4565|ta|TA54173_4565|ta|TA54306_4565	A_99_P425752	32825
TA84405_4565	2.36717	1	1	1	NAC domain-containing protein 71	ta|TA84405_4565|ta|CA603925|tc|TC383428|tc|TC409524	A_99_P423302	13839
TC421665	1	3.63169	1	1	Transcription factor Myb2	tc|TC421665|tc|TC384792	A_99_P479147	37654
CF133748	1	3.56655	1	1	Myb-related protein	ta|CF133748|tc|TC378272	A_99_P453952	5264
TA73273_4565	1	3.14351	1	3.47064	ATP-dependent RNA helicase	ta|TA73273_4565|tc|TC388850|tc|TC394717	A_99_P271141	28142
TA100085_4565	1	1	1	3.4983	ARK protein	ta|TA100085_4565|tc|TC398244	A_99_P360266	21911
TA64630_4565	1	1	1	2.35471	Aquaporin	ta|TA64630_4565|tc|TC435929	A_99_P240586	20137
TA62772_4565	1	1	1	3.12932	Aquaporin PIP1	ta|TA62772_4565|tc|TC370036	A_99_P234076	10538
Response to oxidative stress
TA61073_4565	1	1	0.334447	1	Zinc-containing alcohol dehydrogenase superfamily	ta|TA61073_4565|ta|CD905968|ta|CK205859|tc|TC413085	A_99_P408522	21811
CA600821	1	1	0.276011	3.04957	Metallothioneine type2	ta|CA600821|tc|TC410629	A_99_P460107	16140
TA58666_4565	3.59196	2.63634	1	4.79394	Metallothionein-like protein type 3	ta|TA58666_4565|tc|TC401261	A_99_P446552	19674
TA65180_4565	11.1557	1	1	4.61072	PR17d precursor	ta|TA65180_4565|ta|CA682143|tc|TC415690	A_99_P242791	20412
TA80327_4565	3.31334	1	1	1	Peroxisomal-coenzyme a synthetase	ta|TA80327_4565|tc|TC453441	A_99_P295351	41985
TA64432_4565	2.26681	1	1	1	Glutathione-S-transferase	ta|TA64432_4565|tc|TC400477	A_99_P239886	42661
TA61435_4565	0.351269	0.35537	1	0.0971469	Peroxidase 6	ta|TA61435_4565|ta|CA685752|tc|TC407750|tc|TC450152	A_99_P552147	16980
BQ161851	0.495034	0.404943	1	0.21883	Peroxidase	ta|BQ161851|tc|TC390065	A_99_P431937	25512
CK212695	1	1	1	0.326772	Class III peroxidase 62 precursor	ta|CK212695|tc|TC370038	A_99_P407997	44165
TA67746_4565	1	1	1	4.1175	Aldose reductase	ta|TA67746_4565|ta|CA741454|tc|TC374388|tc|TC437762	A_99_P252121	11372
TA77562_4565	1	1	1	3.20466	ABC1 family protein-like	ta|TA77562_4565|ta|BQ236874|tc|TC370075	A_99_P285771	37317
TC422042	1	1	1	3.67619	Short chain alcohol dehydrogenase-like	tc|TC422042	A_99_P152847	16834
TA90985_4565	1	1	1	2.89807	Glutathione peroxidase-like protein GPX15Hv	ta|TA90985_4565|tc|TC428069|tc|TC387545	A_99_P491687	28365
TC426163	1	1	1	0.180134	Glutaredoxin-C1 precursor	tc|TC426163	A_99_P487912	11412
TA84010_4565	1	1	1	0.455774	Nodulin-like protein	ta|TA84010_4565|tc|TC380953|tc|TC385269	A_99_P307876	15025
TA66389_4565	1	1	1	0.19064	Peroxidase precursor	ta|TA66389_4565|ta|TA66384_4565|ta|BJ281736|tc|TC409014	A_99_P247391	14997
Response to pathogens
TA55707_4565	1	0.54858	3.44245	1	Thaumatin-like protein TLP4	ta|TA55707_4565|ta|CA670411|ta|CV774285|tc|TC413450	A_99_P509202	23176
TC426538	1	0.4366	13.5307	0.266338	Chitinase 2	tc|TC426538	A_99_P488752	20923
TA72415_4565	1	0.38203	4.85973	0.323536	Chitinase	ta|TA72415_4565|ta|CK212185|tc|TC372159	A_99_P268406	11345
TA65444_4565	1	1	0.390665	2.45949	Reticulon	ta|TA65444_4565|ta|TA65446_4565|ta|CK162726|tc|TC374779	A_99_P412857	7188
TA70475_4565	1	1	0.4104	1	RGA2	ta|TA70475_4565|tc|TC390879|tc|TC400364	A_99_P433007	20640
TC442947	1	1	0.328141	1	ENOD40-like protein	tc|TC442947	A_99_P525387	1183
TA53249_4565	1	1	0.255561	1	IPS1 riboregulator	ta|TA53249_4565|ta|CJ668336|tc|TC404244	A_99_P207336	20707
TA66652_4565	17.1386	1	1	1	Protein WIR1B	ta|TA66652_4565|tc|TC401757	A_99_P248341	33427
GR302911	13.8584	1	1	1	WIR1	gb|GR302911|tc|TC419186	A_99_P488332	14017
TC419763	10.4972	1	1	1	Protein WIR1A	tc|TC419763	A_99_P475682	36715
TA73316_4565	4.46048	1	1	1	Pathogen-related protein	ta|TA73316_4565|ta|TA73318_4565|tc|TC444858	A_99_P271256	41870
AF112963	3.10353	1	1	3.69038	Chitinase II precursor (Cht2)	gb|AF112963|ta|TA93063_4565|ta|CJ561279|tc|TC371620	A_99_P000381	24453
TC370624	1	2.73628	1	1	MLA7	tc|TC370624	A_99_P408547	22360
TA83143_4565	1	2.72109	1	5.70606	Hydrolase, alpha/beta fold family-like	ta|TA83143_4565|ta|TA83142_4565|ta|CJ608712|tc|TC381178	A_99_P304906	15369
TA69803_4565	1	1	1	5.86586	VTC2-like protein	ta|TA69803_4565|ta|TA69802_4565|tc|TC383677|tc|TC391835	A_99_P259271	42520
AY387686	1	1	1	4.17469	Harpin binding protein 1 (HrBP1-1)	gb|AY387686|ta|TA89246_4565|tc|TC368718	A_99_P645996	44828
CK162011	1	1	1	0.341996	Glucan endo-1,3-beta-glucosidase isoenzyme I	ta|CK162011|tc|TC428544	A_99_P492787	8899
Y09917	1	1	1	0.263717	Germin-like protein 3	gb|Y09917|gb|FJ815174|ta|TA60105_4565|ta|TA60084_4565	A_99_P546587	21507
Secondary metabolism
DQ208192	9.6489	1	1	1	Flavanone 3-hydroxylase	gb|DQ208192|ta|TA54268_4565|ta|TA53990_4565|ta|TA54125_4565	A_99_P163772	30321
TA69335_4565	1	11.9472	1	10.521	Chalcone synthase 2	ta|TA69335_4565|ta|BQ619684|ta|CD903042|tc|TC385194	A_99_P174849	25042
AY286098	1	1	1	6.31039	Chalcone synthase (CHS1)	gb|AY286098|gb|AY286097|ta|TA87356_4565|tc|TC368698	A_99_P163037	29628
TA50072_4565	1	1	1	5.79423	Pyridoxal biosynthesis protein PDX1.1	ta|TA50072_4565|ta|BJ256106|tc|TC413627	A_99_P197801	18956
JQ307210	1	1	1	2.46471	TaJNFPS-4 farnesyl pyrophosphate synthase	gb|JQ307210|ta|TA68574_4565|ta|TA68575_4565|ta|TA68576_4565	A_99_P255071	6487
TA69487_4565	1	1	1	3.20333	Nicotianamine sythase 3	ta|TA69487_4565|tc|TC394910	A_99_P258261	20065
Pigment biosynthesis
TA92426_4565	4.61921	1	1	3.74904	Beta-carotene hydroxylase	ta|TA92426_4565|tc|TC401433	A_99_P336181	23802
AY596267	1	1	1	3.38627	Polyphenol oxidase	gb|AY596267|ta|TA101253_4565|tc|TC369222	A_99_P081185	22056
TA72038_4565	1	1	1	2.40035	Lycopene beta-cyclase	ta|TA72038_4565|tc|TC429030	A_99_P267096	33927
TA56529_4565	1	1	1	0.465947	Glutamyl-tRNA reductase 2	ta|TA56529_4565|ta|CD923314|tc|TC441372	A_99_P216016	43656
Flowering and seed maturation
TA84120_4565	1	1	0.413978	1	Protein EGG APPARATUS-1	ta|TA84120_4565|tc|TC437285	A_99_P308216	36050
TA86268_4565	1	1	1	2.41927	CONSTANS interacting protein 5	ta|TA86268_4565|tc|TC383052	A_99_P315626	21018
TA50354_4565	1	1	1	3.14422	Pyruvate kinase	ta|TA50354_4565|tc|TC455627|tc|TC376272|tc|TC423822	A_99_P558877	37866
Growth and development
TA72187_4565	1	1	0.287621	1	Cell Division Protein AAA ATPase family	ta|TA72187_4565|ta|CA745754|tc|TC440364	A_99_P267636	41732
CK211204	3.12791	3.80235	1	1	ZIM motif family protein	ta|CK211204|ta|BM138703|ta|CK212740|tc|TC416451	A_99_P469812	31070
CK196320	3.05271	1	1	2.41933	Cell death associated protein	ta|CK196320|tc|TC447100	A_99_P536337	8482
TA56545_4565	1	2.3451	1	1	1-aminocyclopropane-1-carboxylate oxidase	ta|TA56545_4565|tc|TC412180	A_99_P216071	11632
TA56454_4565	0.222158	0.382452	1	1	Auxin-repressed protein	ta|TA56454_4565|tc|TC403503|tc|TC407200	A_99_P215761	27870
TA61883_4565	1	0.373864	1	1	Sterol desaturase family protein	ta|TA61883_4565|ta|TA61889_4565|tc|TC402265	A_99_P231241	32885
TA74119_4565	1	1	1	3.2686	Serine carboxypeptidase 1 precursor	ta|TA74119_4565|tc|TC402953	A_99_P273981	5019
CA733338	1	1	1	0.33086	Kelch repeat-containing F-box-like	ta|CA733338|tc|TC459467	A_99_P568977	2248
TA86474_4565	1	1	1	0.240516	Auxin Efflux Carrier	ta|TA86474_4565|ta|CJ670181|tc|TC459276	A_99_P192117	12326
TA70786_4565	1	1	1	0.341726	Dormancy/auxin associated protein	ta|TA70786_4565|ta|TA70787_4565|tc|TC448944|tc|TC443910	A_99_P262816	1345
Cell wall structure and function
TA87087_4565	1	1	0.0592428	1	Cinnamyl alcohol dehydrogenase	ta|TA87087_4565|tc|TC406587	A_99_P318481	8569
TA68562_4565	1	1	0.376623	1	Glycoside hydrolase, family 19	ta|TA68562_4565|ta|TA68566_4565|ta|TA68567_4565|tc|TC437984	A_99_P255031	1863
TA66611_4565	1	1	0.337209	1	Fasciclin-like protein FLA15	ta|TA66611_4565|ta|CA732456|tc|TC410644|tc|TC446041	A_99_P248201	22500
CK152333	1	1	0.320218	1	Type 1 non specific lipid transfer protein precursor	ta|CK152333|tc|TC400994	A_99_P446157	36915
CK205454	1	1	0.369907	1	Non-specific lipid transfer protein 1 precursor	ta|CK205454|tc|TC386576	A_99_P427502	36085
TA61828_4565	1	1	0.366803	1	Non-specific lipid-transfer protein	ta|TA61828_4565|tc|TC390968|tc|TC385911	A_99_P231006	27677
TA91600_4565	1	1	1	2.98669	Protein DSE2 precursor	ta|TA91600_4565|tc|TC418890|tc|TC423081	A_99_P333491	35745
TA107115_4565	1	1	1	5.004	Galactose-binding like	ta|TA107115_4565|tc|TC392167	A_99_P386442	35996
Chloroplast structure and function
TA69442_4565	1	0.341509	1	0.186773	Plastid-specific 30S ribosomal protein 1, chloroplast precursor	ta|TA69442_4565|ta|TA69443_4565|ta|CK212082|tc|TC451922	A_99_P258121	37451
TA92734_4565	1	1	0.314964	1	Diap1 protein	ta|TA92734_4565|tc|TC422388	A_99_P337136	42984
TA103644_4565	1	1	1	2.51779	CRS2-associated factor 1, chloroplast precursor	ta|TA103644_4565|tc|TC444558	A_99_P010186	14454
Light harvesting
TA59580_4565	0.309883	0.180607	1	0.168711	Light-regulated protein precursor	ta|TA59580_4565|ta|TA59582_4565|ta|CA666030|tc|TC393807	A_99_P223621	14346
TA53867_4565	1	0.154921	1	0.17828	Light-induced protein 1-like	ta|TA53867_4565|ta|CD861644|ta|CV774504|tc|TC446281	A_99_P209081	23883
TC371150	1	0.146363	1	0.0368121	Chlorophyll a/b-binding protein WCAB precursor	tc|TC371150	A_99_P409112	19146
TA63710_4565	1	1	1	0.363646	Chlorophyll a-b binding protein of LHCII type III, chloroplast precursor	ta|TA63710_4565|tc|TC390034	A_99_P237481	36780
TA55816_4565	1	1	1	0.277421	Light-harvesting complex I	ta|TA55816_4565|ta|CJ731763|tc|TC435331	A_99_P214401	27084
TC372144	1	1	1	0.191485	Chlorophyll a/b binding protein precursor	tc|TC372144	A_99_P410077	391
CK217674	1	1	1	0.234634	Chloroplast pigment-binding protein CP24	ta|CK217674|tc|TC394184	A_99_P437157	39278
Photosynthesis
CK212581	1	1	1	4.19665	Photosystem II reaction center psb28 protein	ta|CK212581|tc|TC384139	A_99_P424262	24845
TA64071_4565	1	1	1	3.45878	Cytochrome b6-f complex iron-sulfur subunit, chloroplast precursor	ta|TA64071_4565|tc|TC406166	A_99_P238726	35747
Carbohydrate metabolism
CJ604231	1	1	1	3.25063	Carbohydrate kinase-like protein	ta|CJ604231|tc|TC397825	A_99_P441937	19794
TA64268_4565	1	1	1	3.06938	Fructose-bisphosphate aldolase	ta|TA64268_4565|ta|CJ558338|tc|TC376307	A_99_P239376	27725
TA64671_4565	1	1	1	2.1494	UTP--glucose-1-phosphate uridylyltransferase	ta|TA64671_4565|ta|CA607514|tc|TC370098|tc|TC370896	A_99_P004441	24422
TA57382_4565	1	1	1	3.2052	Phosphate/phosphoenolpyruvate translocator	ta|TA57382_4565|tc|TC393910	A_99_P217791	33087
TA75511_4565	1	1	1	5.19039	Monosaccharide transporter 4	ta|TA75511_4565|ta|CD884543|tc|TC378153	A_99_P278701	5738
TA83785_4565	1	1	1	4.65393	Beta-amylase PCT-BMYI	ta|TA83785_4565|ta|CK212937|ta|CD938974|tc|TC432151	A_99_P307146	32293
Amino acid metabolism
TC430171	1	1	0.0892626	1	Indole-3-glycerol phosphate lyase	tc|TC430171	A_99_P496502	8009
TA69994_4565	1	1	0.376433	1	Glutamate dehydrogenase	ta|TA69994_4565|ta|CJ567636|tc|TC387564	A_99_P259951	10977
TA69140_4565	1	1	0.306084	3.94183	L-allo-threonine aldolase-related protein	ta|TA69140_4565|ta|TA69141_4565|tc|TC403445|tc|TC382170	A_99_P449637	41850
TC393988	1	1	0.130762	3.1335	Glycine/proline-rich protein	tc|TC393988	A_99_P543657	7174
TA64535_4565	1	1	0.340233	6.81491	Glycine decarboxylase P subunit	ta|TA64535_4565|ta|TA64537_4565|tc|TC374621|tc|TC375538	A_99_P240211	15342
TA64069_4565	1	1	1	2.74208	Mitochondrial aspartate-glutamate carrier protein-like	ta|TA64069_4565|tc|TC373422	A_99_P238716	33459
CJ667842	1	1	1	2.29747	Ferredoxin, chloroplast precursor	ta|CJ667842|tc|TC415949	A_99_P436607	43120
TA63842_4565	1	1	1	2.24369	Inositol monophosphatase family protein	ta|TA63842_4565|tc|TC396412	A_99_P237761	10378
TA60889_4565	1	1	1	3.19804	S-adenosylmethionine synthetase	ta|TA60889_4565|ta|TA60901_4565|ta|CK216305|tc|TC374119	A_99_P227511	9678
Protein metabolism
TA59594_4565	3.21513	1	1	1	22.3 kDa heat-shock protein	ta|TA59594_4565|tc|TC407342	A_99_P223676	44575
TC402730	1	1	0.249887	1	70 kDa heat shock protein	tc|TC402730	A_99_P448647	36262
HM209063	1	1	0.235367	1	Heat shock protein 70-like	gb|HM209063|gb|HP619938|gb|L41505|ta|TA62928_4565	A_99_P234541	16785
TA64099_4565	1	1	0.151869	1	Heat shock protein 80 kDa	ta|TA64099_4565|ta|TA64100_4565|tc|TC394212	A_99_P238761	26
TC414782	1	1	0.263852	4.79818	Asparaginase	tc|TC414782	A_99_P466942	23822
TA53535_4565	1	1	0.192349	3.82643	Ubiquitin carrier protein	ta|TA53535_4565|ta|TA53345_4565|ta|CD884325|tc|TC377198	A_99_P208256	24763
TA67255_4565	1	1	1	3.70191	Heat-shock protein precursor	ta|TA67255_4565|ta|CK156739|tc|TC429655	A_99_P250376	10187
TA61948_4565	1	1	1	5.97786	C13 endopeptidase NP1 precursor	ta|TA61948_4565|tc|TC398719	A_99_P231506	7777
Lipid metabolism
TA74269_4565	1	1	1	2.26549	Plastid omega-3 fatty acid desaturase	ta|TA74269_4565|tc|TC378240|tc|TC423235	A_99_P274486	33811
Energy metabolism
TC449528	1	0.181364	1	0.077692	Cytochrome c	tc|TC449528	A_99_P542662	24896
TA82476_4565	1	1	1	0.508567	HAP3-like transcriptional-activator	ta|TA82476_4565|ta|BJ208952|ta|BT009265|tc|TC448500	A_99_P302726	42546
Signaling
TA72110_4565	2.15735	1	1	1	Ca2+/H+-exchanging protein	ta|TA72110_4565|tc|TC385039	A_99_P267366	40677
TC376621	1	2.78942	1	1	Calcium-dependent protein kinase	tc|TC376621	A_99_P415112	24028
Transcription regulation
CA721206	1	1	0.329568	2.52832	Zinc finger protein 219	ta|CA721206|tc|TC446120	A_99_P533942	44850
D16416	3.86603	1	1	1	Zinc-finger protein WZF1	gb|D16416|ta|TA77580_4565|tc|TC426981|tc|TC371841	A_99_P489622	10858
TC436900	3.13492	1	1	1	Histone H1 WH1A.3	tc|TC436900	A_99_P511852	5211
Transcription, RNA-processing and translation
U34402	1	1	1	2.65463	Single-subunit RNA polymerase C	gb|U34402|ta|TA88096_4565|tc|TC377460	A_99_P000396	29420
TA85618_4565	1	1	1	3.92761	DEAD-box ATP-dependent RNA helicase 26	ta|TA85618_4565|ta|TA85617_4565|tc|TC414240	A_99_P313296	14881
TA91346_4565	1	1	1	2.11167	DEAD-box ATP-dependent RNA helicase 22	ta|TA91346_4565|ta|BJ231692|ta|EB512383|tc|TC422954	A_99_P332671	20451
TA79230_4565	1	1	1	2.34224	40S ribosomal protein S14	ta|TA79230_4565|ta|TA79231_4565|tc|TC372664|tc|TC439088	A_99_P165432	22492
