# Supplementary material for: Deciphering immune responses primed by a bacterial lipopeptide in wheat towards Zymoseptoria tritici
Source: Front Plant Sci. 2023 Jan 26;13:1074447. doi: 10.3389/fpls.2022.1074447 (PMC9909289; doi:10.3389/fpls.2022.1074447)
Supplement: Supplementary file 4 [file Table_3.xlsx]

## Sheet: Feuil1
Supplementary Table S3. List of the 54 metabolites detected in wheat leaves (cv. Alixan) with ultra-high-performance liquid chromatography-mass spectrometry (UHPLC-MS), using a targeted metabolomic approach. Metabolites were classified according to KEGG (Kyoto Encyclopedia of Genes and Genomes; http://www.genome.ad.jp/kegg) and PubChem (http://pubchem.ncbi.nlm.nih.gov) databases. Id: identifier; …
Id	Metabolite	Formula	Class	Detected m/z	m/z error (ppm)	RT (min)	KEGG ID	PubChem CID
1	Arginine	C6H14N4O2	Amino acids	175.1190	0.20	0.85	C00062	6322
2	Asparagine	C4H8N2O3	Amino acids	133.0609	0.86	0.98	C00152	6267
3	Aspartic acid	C4H7NO4	Amino acids	134.0449	0.69	1.02	C00049	5960
4	Glutamic acid	C5H9NO4	Amino acids	148.0604	0.77	1.01	C00025	4525487
5	Glutamine	C5H10N2O3	Amino acids	147.0764	0.09	0.99	C00064	5961
6	Histidine	C6H9N3O2	Amino acids	156.0769	0.68	1.01	C00135	6274
7	Hydroxyproline	C5H9NO3	Amino acids	132.0656	0.70	1.01	C01157	5810
8	Isoleucine	C6H13NO2	Amino acids	132.1020	0.76	1.56	C00407	6306
9	Leucine	C6H13NO2	Amino acids	132.1020	0.76	1.62	C00123	6106
10	Lysine	C6H14N2O2	Amino acids	147.1129	0.44	0.84	C00047	5962
11	Methionine	C5H11NO2S	Amino acids	150.0584	0.36	2.04	C00073	6137
12	Phenylalanine	C9H11NO2	Amino acids	166.0862	-0.53	4.30	C00079	6140
13	Proline	C5H9NO2	Amino acids	116.0708	1.69	1.23	C00148	145742
14	Threonine	C4H9NO3	Amino acids	120.0657	1.22	1.08	C00188	6288
15	Tryptophan	C11H12N2O2	Amino acids	205.0973	0.51	4.75	C00078	6305
16	Tyrosine	C9H11NO3	Amino acids	182.0813	0.54	3.20	C00082	6057
17	Valine	C5H11NO2	Amino acids	118.0863	0.48	1.14	C00183	6287
18	Methylpipecolic acid	C7H13NO2	Amino acid derivatives	144.1019	0.27	1.08	C10172	115244
19	DHBOA-hexosyl-hexoside	C14H17NO9	Benzoxazinoids	523.1773	0.59	4.48
20	DHBOA-hexosyl-deoxyhexoside	C8H7NO4	Benzoxazinoids	490.1557	0.59	4.71
21	HBOA	C8H7NO3	Benzoxazinoids	166.0499	0.34	5.92	C15769	322636
22	HBOA-glucoside	C14H17NO8	Benzoxazinoids	328.1027	0.09	4.71		14605136
23	HM2BOA	C10H11NO5	Benzoxazinoids	226.0709	-0.61	5.51		11064107
24	HMBOA-hexoside	C10H11NO5	Benzoxazinoids	358.1241	-0.61	5.06
25	HM2BOA-hexoside	C16H21NO10	Benzoxazinoids	388.1245	1.86	5.36
26	Apigenin-6-C-hexoside-C-pentoside	C26H28O14	Flavonoids	565.1553	0.09	4.66
27	Chrysoeriol-6-C-hexoside	C22H22O11	Flavonoids	463.1237	0.43	5.35	C05990	442611
28	Chrysoeriol-C-hexosyl-O-deoxyhexoside	C28H32O15	Flavonoids	609.1817	0.50	5.24
29	Chrysoeriol-C-hexosyl-O-hexoside	C28H32O16	Flavonoids	625.1766	0.42	5.17		72193674
30	Luteolin-C-hexosyl-deoxyhexoside	C27H30O15	Flavonoids	595.1660	0.45	5.02
31	Luteolin-C-hexosyl-C-pentoside	C26H28O15	Flavonoids	581.1504	0.51	4.97		44258081
32	Luteolin-C-hexosyl-O-hexoside	C27H30O16	Flavonoids	611.1608	0.23	4.98
33	Luteolin-6-C-hexoside	C21H20O11	Flavonoids	449.108	0.36	5.00	C01750	5280459
34	Tricin	C17H14O7	Flavonoids	331.0812	0.09	6.45	C10193	5281702
35	Tricin-7-O-hexoside	C23H24O12	Flavonoids	493.1343	0.5	5.56		5322022
36	Abscisic acid	C15H20O4	Phytohormones	265.14343	0.53	6.06
37	Abscisic acid glucose ester	C21H30O9	Phytohormones	427.19625	0.35	4.33
38	Indole acetic acid	C10H9NO2	Phytohormones	176.0706	1.16	1.71
39	OPDA	C18H28O3	Phytohormones	293.211121	0.89	7.42
40	Jasmonic acid	C12H18O3	Phytohormones	211.1329	0.14	6.27	C08491	5281166
41	Methyljasmonate	C13H20O3	Phytohormones	225.148521	0.31	6.88
42	Salicylic acid	C7H6O3	Phytohormones	139.039	0.21	4.5	C00805	338
43	Methylsalicylate	C8H8O3	Phytohormones	153.05462	0.56	5.39
44	Coumaroylagmatine	C14H20N4O2	Hydroxycinnamic acid amides	277.1659	0.01	4.66	C04498	5280691
45	Coumaroylputrescine	C13H18N2O2	Hydroxycinnamic acid amides	235.1441	0.02	4.50
46	Coumaroylcadaverine	C14H20N2O2	Hydroxycinnamic acid amides	249.15975	0.56	3.97
47	Caffeoylagmatine	C14H20N4O3	Hydroxycinnamic acid amides	293.1608	0.06	4.52
48	Caffeoylputrescine	C13H18N2O3	Hydroxycinnamic acid amides	251.139	0.08	4.47	C03002
49	Feruloylagmatine	C15H22N4O3	Hydroxycinnamic acid amides	307.1765	0.11	4.57	C18325	46173376
50	Feruloylputrescine	C14H20N2O3	Hydroxycinnamic acid amides	265.1548	0.49	4.70	C10497	5281796
51	Feruloylcadaverine	C15H22N2O3	Hydroxycinnamic acid amides	279.1702	0.43	4.85
52	Hydroxyferuloylputrescine	C14H20N2O4	Hydroxycinnamic acid amides	281.14955	0.12	3.81
53	Sinapoylagmatine	C16H24N4O4	Hydroxycinnamic acid amides	337.187	0.09	4.65
54	Sinapoylputrescine	C15H22N2O4	Hydroxycinnamic acid amides	295.1653	0.22	4.56
